# Supplementary material for: Combination of the National Early Warning Score (NEWS) and inflammatory biomarkers for early risk stratification in emergency department patients: results of a multinational, observational study
Source: PubMed Central journal article supplement — BMJ Open. 2019 Jan 17;9(1):e024636. doi: 10.1136/bmjopen-2018-024636 (PMC6340461; doi:10.1136/bmjopen-2018-024636), 2019-01-17
Supplement: bmjopen-2018-024636supp001.pdf [file bmjopen-2018-024636supp001.pdf]

**Table A1: Comparison of the total cohort and cohort selected for analysis**

| Number of Patients, n (%)                           | Total Cohort<br>7132 | Selected Cohort<br>1303 |
|-----------------------------------------------------|----------------------|-------------------------|
| <b>Sociodemographics</b>                            |                      |                         |
| Age, median (quartiles)                             | 62 (46, 76)          | 66 (52, 80)             |
| Male gender, n (%)                                  | 3767 (53.3%)         | 658 (50.5%)             |
| <b>Vital signs, median (quartiles)</b>              |                      |                         |
| Blood pressure diastolic (mmHg)                     | 80 (70, 90)          | 78 (67, 89)             |
| Blood pressure systolic (mmHg)                      | 137 (121, 154)       | 139 (121, 159)          |
| Confusion, n (%)                                    | 522 (7.3%)           | 44 (3.4%)               |
| Pulse (bpm)                                         | 83 (71, 97)          | 83 (71, 98)             |
| Respiratory rate (per minute)                       | 18 (18, 20)          | 18 (18, 20)             |
| SpO <sub>2</sub> (%)                                | 96.8 (94, 98)        | 97 (95, 99)             |
| Temperature (°C)                                    | 36.8 (36.4, 37.2)    | 36.6 (36.2, 36.9)       |
| <b>Initial blood biomarkers, median (quartiles)</b> |                      |                         |
| Creatinine (µmol/L)                                 | 81.0 (67.0, 103.0)   | 79.6 (70.7, 106.1)      |
| Glucose (mmol/L)                                    | 6.1 (5.3, 7.5)       | 6.3 (5.3, 8.1)          |
| White blood cells (G/L)                             | 8.385 (6.58, 10.98)  | 8.2 (6.3, 10.8)         |
| PCT (µg/L)                                          | 0.08 (0.06, 0.13)    | 0.08 (0.06, 0.14)       |
| ProADM (nmol/L)                                     | 0.8 (0.6, 1.2)       | 0.9 (0.6, 1.5)          |
| <b>Main symptom at ED admission, n (%)</b>          |                      |                         |
| Diarrhea, vomitus, dysuria                          | 495 (6.9%)           | 106 (8.1%)              |
| Fever                                               | 343 (4.8%)           | 23 (1.8%)               |
| Gastrointestinal bleeding                           | 199 (2.8%)           | 31 (2.4%)               |
| Neurological symptoms                               | 1379 (19.3%)         | 90 (6.9%)               |
| Nonthoracic pain                                    | 1217 (17.1%)         | 124 (9.5%)              |
| Respiratory symptoms                                | 948 (13.3%)          | 356 (27.3%)             |
| Thoracic pain                                       | 1038 (14.6%)         | 240 (18.4%)             |
| Worsening of general condition                      | 837 (11.7%)          | 333 (25.6%)             |
| <b>Main diagnosis, n (%)</b>                        |                      |                         |
| Cancer                                              | 344 (4.8%)           | 52 (4.0%)               |
| Cardiovascular                                      | 1660 (23.3%)         | 486 (37.3%)             |
| Gastrointestinal                                    | 983 (13.8%)          | 160 (12.3%)             |
| Infection                                           | 1039 (14.6%)         | 190 (14.6%)             |
| Metabolic                                           | 192 (2.7%)           | 49 (3.8%)               |
| Neurological                                        | 1566 (22.0%)         | 176 (13.5%)             |
| Pulmonary                                           | 297 (4.2%)           | 110 (8.4%)              |
| Miscellaneous                                       | 1051 (14.7%)         | 80 (6.1%)               |
| <b>Comorbidities, n (%)</b>                         |                      |                         |
| Cancer                                              | 968 (13.6%)          | 123 (9.4%)              |
| Chronic renal disease                               | 872 (12.2%)          | 96 (7.4%)               |
| Congestive heart failure                            | 487 (6.8%)           | 154 (11.8%)             |
| COPD                                                | 359 (5.0%)           | 94 (7.2%)               |
| Coronary heart disease                              | 838 (11.7%)          | 164 (12.6%)             |
| Diabetes                                            | 1088 (15.3%)         | 269 (20.6%)             |
| History of stroke                                   | 566 (7.9%)           | 22 (1.7%)               |
| Hypertension                                        | 2795 (39.2%)         | 568 (43.6%)             |
| <b>Events, n (%)</b>                                |                      |                         |
| Death 30 days                                       | 331 (4.6%)           | 54 (4.1%)               |
| Intensive Care                                      | 453 (6.4%)           | 171 (13.1%)             |

COPD, chronic obstructive pulmonary disease; ED, emergency department; NEWS, national early warning score; PCT, procalcitonin; MR-proADM, midregional pro-Adrenomedullin; SpO<sub>2</sub>, peripheral oxygen saturation (%). NEWS was calculated without oxygen supplementation data and thus represents “NEWS - potentially minus 2”

**Table A2: Regression analyses for associations of NEWS and blood markers with primary outcome**

|                  | Events, n (%) | 30 day mortality<br>Regression analyses, OR (95% CI), p-value |                                 |                                 |                                 |
|------------------|---------------|---------------------------------------------------------------|---------------------------------|---------------------------------|---------------------------------|
|                  |               | Unadjusted                                                    | Model 1                         | Model 2                         | Model 3                         |
| <b>NEWS</b>      |               |                                                               |                                 |                                 |                                 |
| Low              | 25/966 (2.6)  | Ref.                                                          | Ref.                            | Ref.                            | Ref.                            |
| Moderate         | 16/262 (6.1)  | 2.45 (1.29 to 4.66), p=0.006                                  | 2.04 (1.06 to 3.92), p=0.032    | 2.01 (1.05 to 3.87), p=0.036    | 1.71 (0.87 to 3.37), p=0.123    |
| High             | 13/75 (17.3)  | 7.89 (3.85 to 16.18), p<0.001                                 | 7.01 (3.36 to 14.63), p<0.001   | 6.79 (3.23 to 14.3), p<0.001    | 4.89 (2.22 to 10.75), p<0.001   |
| Continuous       |               | 1.35 (1.23 to 1.48), p<0.001                                  | 1.32 (1.2 to 1.46), p<0.001     | 1.32 (1.19 to 1.45), p<0.001    | 1.26 (1.13 to 1.40), p<0.001    |
| <b>WBC</b>       |               |                                                               |                                 |                                 |                                 |
| 4.0-10.0         | 27/829 (3.3)  | Ref.                                                          | Ref.                            | Ref.                            | Ref.                            |
| 10.01-15.0       | 10/299 (3.3)  | 1.03 (0.49 to 2.15), p=0.942                                  | 1.05 (0.5 to 2.21), p=0.893     | 1.05 (0.5 to 2.21), p=0.9       | 1.07 (0.50 to 2.31), p=0.855    |
| >15.0            | 15/111 (13.5) | 4.64 (2.39 to 9.03), p<0.001                                  | 4.41 (2.22 to 8.76), p=0        | 4.37 (2.2 to 8.69), p=0         | 3.73 (1.80 to 7.75), p<0.001    |
| <4.0             | 2/46 (4.4)    | 1.35 (0.31 to 5.86), p=0.689                                  | 1.52 (0.34 to 6.74), p=0.583    | 1.52 (0.34 to 6.76), p=0.58     | 1.05 (0.22 to 4.99), p=0.951    |
| Continuous       |               | 1.02 (1.00 to 1.03), p=0.051                                  | 1.02 (1 to 1.03), p=0.033       | 1.02 (1 to 1.03), p=0.028       | 1.02 (1.00 to 1.03), p=0.036    |
| <b>PCT</b>       |               |                                                               |                                 |                                 |                                 |
| 1st Quartile     | 5/321 (1.6)   | Ref.                                                          | Ref.                            | Ref.                            | Ref.                            |
| 2nd Quartile     | 7/321 (2.2)   | 1.41 (0.44 to 4.49), p=0.562                                  | 1.32 (0.41 to 4.22), p=0.642    | 1.33 (0.41 to 4.26), p=0.632    | 1.24 (0.38 to 4.09), p=0.722    |
| 3rd Quartile     | 10/321 (3.1)  | 2.03 (0.69 to 6.01), p=0.2                                    | 1.77 (0.59 to 5.26), p=0.307    | 1.84 (0.62 to 5.48), p=0.276    | 1.79 (0.59 to 5.45), p=0.306    |
| 4th Quartile     | 32/322 (9.9)  | 6.97 (2.68 to 18.14), p<0.001                                 | 6.01 (2.29 to 15.79), p<0.001   | 6.12 (2.33 to 16.09), p<0.001   | 5.17 (1.88 to 14.18), p=0.001   |
| Continuous       |               | 2.66 (1.81 to 3.92), p<0.001                                  | 2.77 (1.85 to 4.17), p<0.001    | 2.71 (1.79 to 4.08), p<0.001    | 2.45 (1.54 to 3.89), p<0.001    |
| <b>MR-proADM</b> |               |                                                               |                                 |                                 |                                 |
| 1st Quartile     | 1/324 (0.3)   | Ref.                                                          | Ref.                            | Ref.                            | Ref.                            |
| 2nd Quartile     | 6/325 (1.9)   | 6.08 (0.73 to 50.75), p=0.096                                 | 4.42 (0.52 to 37.78), p=0.175   | 4.44 (0.52 to 37.93), p=0.174   | 4.93 (0.57 to 42.58), p=0.147   |
| 3rd Quartile     | 12/323 (3.7)  | 12.46 (1.61 to 96.42), p=0.016                                | 7.66 (0.94 to 62.38), p=0.057   | 7.77 (0.96 to 63.12), p=0.055   | 7.93 (0.96 to 65.37), p=0.054   |
| 4th Quartile     | 35/326 (10.7) | 38.85 (5.29 to 285.36), p<0.001                               | 22.46 (2.87 to 175.82), p=0.003 | 22.22 (2.84 to 173.70), p=0.003 | 17.18 (2.15 to 137.36), p=0.007 |
| Continuous       |               | 17.58 (8.05 to 38.38), p<0.001                                | 13.89 (5.94 to 32.49), p<0.001  | 13.40 (5.70 to 31.54), p<0.001  | 10.33 (3.77 to 28.34), p<0.001  |

Adjustments: Model 1: age and sex; Model 2: age, sex, and main diagnosis; Model 3: fully adjusted for age, sex, main diagnosis, and comorbidities

For regression analysis with continuous values, PCT and Pro-ADM were log transformed with a base of ten before entering into statistical models. Therefore, the ORs correspond to a tenfold increase in PCT and MR-proADM values.

CI, confidence interval; ICU, intensive care unit; NEWS, national early warning score; PCT, procalcitonin; MR-proADM, midregional pro-Adrenomedullin; Ref, reference; WBC, white blood cell count

NEWS was calculated without oxygen supplementation data and thus represents "NEWS - potentially minus 2"

**Table A3:** Regression analyses for associations of NEWS and blood markers with secondary outcome

|                  | events, n (%) | ICU admission<br>Regression analyses, OR (95% CI), p-value |                               |                               |                               |
|------------------|---------------|------------------------------------------------------------|-------------------------------|-------------------------------|-------------------------------|
|                  |               | unadjusted                                                 | model 1                       | model 2                       | model 3                       |
| <b>NEWS</b>      |               |                                                            |                               |                               |                               |
| Low              | 89/966 (9.2)  | Ref.                                                       | Ref.                          | Ref.                          | Ref.                          |
| Moderate         | 57/262 (21.8) | 2.74 (1.90 to 3.95), p<0.001                               | 2.75 (1.90 to 3.99), p<0.001  | 2.75 (1.90 to 3.99), p<0.001  | 2.71 (1.85 to 3.98), p<0.001  |
| High             | 25/75 (33.3)  | 4.93 (2.91 to 8.35), p<0.001                               | 4.90 (2.88 to 8.35), p<0.001  | 4.88 (2.86 to 8.33), p<0.001  | 4.33 (2.48 to 7.57), p<0.001  |
| Continuous       |               | 1.25 (1.17 to 1.33), p<0.001                               | 1.25 (1.17 to 1.33), p<0.001  | 1.25 (1.17 to 1.33), p<0.001  | 1.24 (1.15 to 1.32), p<0.001  |
| <b>WBC</b>       |               |                                                            |                               |                               |                               |
| 4.0-10.0         | 84/829 (10.1) | Ref.                                                       | Ref.                          | Ref.                          | Ref.                          |
| 10.01-15.0       | 41/299 (13.7) | 1.41 (0.95 to 2.10), p=0.092                               | 1.43 (0.96 to 2.13), p=0.081  | 1.43 (0.96 to 2.13), p=0.081  | 1.52 (1.01 to 2.29), p=0.045  |
| >15.0            | 27/111 (24.3) | 2.85 (1.75 to 4.65), p<0.001                               | 2.75 (1.68 to 4.49), p<0.001  | 2.74 (1.68 to 4.49), p<0.001  | 2.78 (1.67 to 4.62), p<0.001  |
| <4.0             | 15/46 (32.6)  | 4.29 (2.23 to 8.27), p<0.001                               | 4.19 (2.16 to 8.12), p<0.001  | 4.18 (2.15 to 8.10), p<0.001  | 4.42 (2.21 to 8.84), p<0.001  |
| Continuous       |               | 1.01 (0.99 to 1.02), p=0.355                               | 1.01 (0.99 to 1.02), p=0.317  | 1.01 (0.99 to 1.02), p=0.313  | 1.01 (0.99 to 1.02), p=0.267  |
| <b>PCT</b>       |               |                                                            |                               |                               |                               |
| 1st Quartile     | 27/321 (8.4)  | Ref.                                                       | Ref.                          | Ref.                          | Ref.                          |
| 2nd Quartile     | 34/321 (10.6) | 1.29 (0.76 to 2.19), p=0.347                               | 1.27 (0.74 to 2.15), p=0.386  | 1.27 (0.75 to 2.16), p=0.381  | 1.23 (0.72 to 2.11), p=0.449  |
| 3rd Quartile     | 36/321 (11.2) | 1.38 (0.81 to 2.32), p=0.234                               | 1.33 (0.78 to 2.25), p=0.294  | 1.34 (0.79 to 2.27), p=0.276  | 1.35 (0.79 to 2.29), p=0.276  |
| 4th Quartile     | 73/322 (22.7) | 3.19 (1.99 to 5.12), p<0.001                               | 2.99 (1.86 to 4.81), p<0.001  | 3.00 (1.86 to 4.84), p<0.001  | 2.78 (1.68 to 4.59), p<0.001  |
| Continuous       |               | 2.33 (1.76 to 3.08), p<0.001                               | 2.31 (1.74 to 3.07), p<0.001  | 2.31 (1.74 to 3.06), p<0.001  | 2.18 (1.61 to 2.96), p<0.001  |
| <b>MR-proADM</b> |               |                                                            |                               |                               |                               |
| 1st Quartile     | 20/324 (6.2)  | Ref.                                                       | Ref.                          | Ref.                          | Ref.                          |
| 2nd Quartile     | 36/325 (11.1) | 1.89 (1.07 to 3.35), p=0.028                               | 2.26 (1.24 to 4.09), p=0.007  | 2.26 (1.25 to 4.09), p=0.007  | 2.26 (1.24 to 4.13), p=0.008  |
| 3rd Quartile     | 34/323 (10.5) | 1.79 (1.01 to 3.18), p=0.048                               | 2.24 (1.20 to 4.20), p=0.011  | 2.25 (1.20 to 4.20), p=0.011  | 2.25 (1.19 to 4.27), p=0.013  |
| 4th Quartile     | 81/326 (24.9) | 5.03 (3.00 to 8.43), p<0.001                               | 6.36 (3.53 to 11.48), p<0.001 | 6.35 (3.52 to 11.44), p<0.001 | 6.27 (3.36 to 11.68), p<0.001 |
| Continuous       |               | 7.65 (4.59 to 12.75), p<0.001                              | 8.64 (5.00 to 14.95), p<0.001 | 8.62 (4.98 to 14.95), p<0.001 | 9.20 (4.83 to 17.51), p<0.001 |

Adjustments: Model 1: age and sex; Model 2: age, sex, and main diagnosis; Model 3: fully adjusted for age, sex, main diagnosis, and comorbidities

For regression analysis with continues values, PCT and Pro-ADM were log transformed with a base of ten before entering into statistical models. Therefore, the ORs correspond to a tenfold increase in PCT and MR-proADM values.

CI, confidence interval; ICU, intensive care unit; NEWS, national early warning score; PCT, procalcitonin; MR-proADM, midregional pro-Adrenomedullin; Ref, reference; WBC, white blood cell count

NEWS was calculated without oxygen supplementation data and thus represents “NEWS - potentially minus 2”

**Figure A1:** Subgroup analyses. Association of NEWS category with all-cause 30-day mortality among different diagnoses leading to ED admission

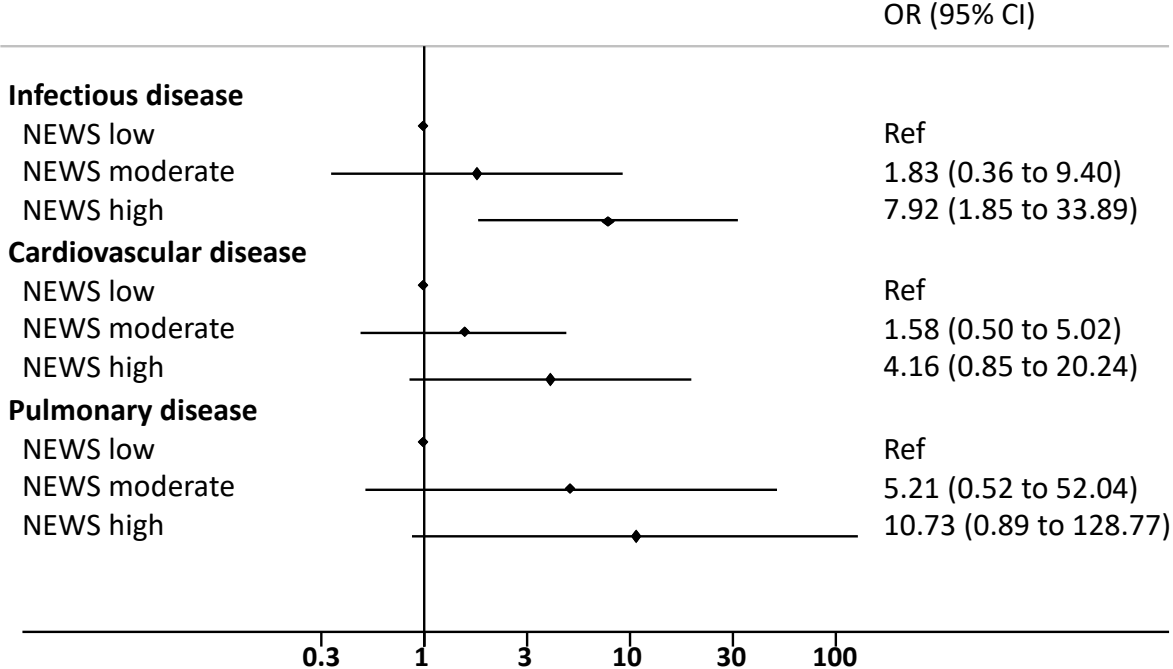

CI, Confidence interval; ED, emergency department; NEWS, national early warning score; OR, Odds ratio  
 NEWS was calculated without oxygen supplementation data and thus represents “NEWS - potentially minus 2”
